# Supplementary material for: US-Guided Fine-Needle Aspiration Cytology of Para-Aortic Lymph Nods Metastasis in Uterine Cervical Cancer: Accuracy and Impact on Clinical Decision Making
Source: Research Square preprint supplement (doi:10.21203/rs.3.rs-395793/v1), 2021-04-22
Supplement: Supplementary file 1 [file 91fe768fb8a2870639dcf536.docx]

Videos caption:

a 49-year-old woman with metastatic squamous carcinoma from cervical cancer presents with a 16mm Lymph node located left paraaortic region above the inferior mesenteric artery(Ⅰ).

Movie 1 manifested that the needle tip was displayed in real time throughout the procedure and the needle tip always remains within the lesion during sampling.

Movie 2 showed that when the needle tip was not clearly visualized, shaking the puncture needle was beneficial to the display of the needle tip.
